# Estimating epidemiologic dynamics from single cross-sectional viral load distributions

James A. Hay<sup>\*1,2,3†</sup>, Lee Kennedy-Shaffer<sup>\*1,2,4†</sup>, Sanjat Kanjilal<sup>5,6</sup>, Marc Lipsitch<sup>1,2,3</sup>, Michael J. Mina<sup>1,2,3†</sup>

\* These authors contributed equally.

<sup>1</sup> Center for Communicable Disease Dynamics, Harvard T. H. Chan School of Public Health, Boston, MA

<sup>2</sup> Department of Epidemiology, Harvard T. H. Chan School of Public Health, Boston, MA

<sup>3</sup> Department of Immunology and Infectious Diseases, Harvard T. H. Chan School of Public Health, Boston, MA

<sup>4</sup> Department of Mathematics and Statistics, Vassar College, Poughkeepsie, NY

<sup>5</sup> Department of Population Medicine, Harvard Pilgrim Health Care Institute, Boston, MA

<sup>6</sup> Department of Infectious Diseases, Brigham and Women's Hospital, Boston, MA

† Correspondence should be addressed to: [jhay@hsph.harvard.edu](mailto:jhay@hsph.harvard.edu) (J.A.H.), [lkennedyshaffer@vassar.edu](mailto:lkennedyshaffer@vassar.edu) (L.K.S.), [mmina@hsph.harvard.edu](mailto:mmina@hsph.harvard.edu) (M.J.M.)

## Funding

This work is supported by U.S. National Institutes of Health Director's Early Independence Award DP5-OD028145 (MJM, JAH), the Morris-Singer Fund (LKS and ML), U.S. Centers for Disease Control and Prevention Award U01IP001121 (LKS and ML), and U.S. National Institute of General Medical Sciences award U54GM088558 (ML, JAH, LKS).

## Data availability

All code is available at [https://github.com/jameshay218/ct\\_dynamics\\_preprint](https://github.com/jameshay218/ct_dynamics_preprint). The Ct values from Massachusetts will be made available in a later version of this manuscript.

## 1 **Abstract**

2 Virologic testing for SARS-CoV-2 has been central to the COVID-19 pandemic response, but  
3 interpreting changes in incidence and fraction of positive tests towards understanding the  
4 epidemic trajectory is confounded by changes in testing practices. Here, we show that the  
5 distribution of viral loads, in the form of Cycle thresholds (Ct), from positive surveillance samples  
6 at a single point in time can provide accurate estimation of an epidemic's trajectory, subverting  
7 the need for repeated case count measurements which are frequently obscured by changes in  
8 testing capacity. We identify a relationship between the population-level cross-sectional  
9 distribution of Ct values and the growth rate of the epidemic, demonstrating how the skewness  
10 and median of detectable Ct values change purely as a mathematical epidemiologic rule without  
11 any change in individual level viral load kinetics or testing. Although at the individual level  
12 measurement variation can complicate interpretation of Ct values for clinical use, we show that  
13 population-level properties reflect underlying epidemic dynamics. In support of these theoretical  
14 findings, we observe a strong relationship between the time-varying effective reproductive  
15 number,  $R(t)$ , and the distribution of Cts among positive surveillance specimens, including median  
16 and skewness, measured in Massachusetts over time. We use the observed relationships to  
17 derive a novel method that allows accurate inference of epidemic growth rate using the distribution  
18 of Ct values observed at a single cross-section in time, which, unlike estimates based on case  
19 counts, is less susceptible to biases from delays in test results and from changing testing  
20 practices. Our findings suggest that instead of discarding individual Ct values from positive  
21 specimens, incorporation of viral loads into public health data streams offers a new approach for  
22 real-time resource allocation and assessment of outbreak mitigation strategies, even where  
23 repeat incidence data is not available. Ct values or similar viral load data should be regularly  
24 reported to public health officials by testing centers and incorporated into monitoring programs.

## 25 Introduction

26 Tracking trends in the incidence of infection during an epidemic are vital for deciding on  
27 appropriate public health response measures (1–3). This information can help decision-makers  
28 understand the need for and efficacy of non-pharmaceutical interventions, to plan the deployment  
29 of public health resources, and the use of scarce hospital beds and personal protective  
30 equipment. In the severe acute respiratory syndrome coronavirus-2 (SARS-CoV-2) pandemic,  
31 estimating the outbreak trajectory and key epidemiological parameters such as the time-varying  
32 effective reproductive number,  $R(t)$ , has generally been done by using daily observed case  
33 counts, percent of tests positive, or death counts, ideally confirmed by reverse-transcription  
34 quantitative polymerase chain reaction (RT-qPCR) testing. Because of the nonspecific symptoms  
35 and variable incubation periods of COVID-19 (4, 5), the limited and time-varying availability of  
36 testing in many parts of the world, including in the United States, and the delay between infections  
37 and reported tests or confirmed deaths (6), these approaches are limited in their ability to reliably  
38 and promptly detect underlying changes in infection counts (7). In particular, whether changes in  
39 case counts at different times have stemmed from changes in testing or reflect epidemic growth  
40 or decay have been major topics of debate with important economic, health and political  
41 ramifications.

42 Virologic testing is an important method for determining the infection status of an individual and  
43 the prevalence of infection in a community. RT-qPCR testing is currently the primary approach  
44 for virus detection (8, 9). While these tests have quantitative results in the form of cycle threshold  
45 (Ct) values, which are inversely correlated with  $\log_{10}$  viral loads, they are often reported only as  
46 binary results (10, 11). Previous work for other infectious diseases has focused on identifying  
47 correlations between Ct values and clinical severity and transmissibility (12–14). In addition, Ct  
48 values or viral loads may be useful in clinical determinations about the need for isolation and  
49 quarantine for SARS-CoV-2 (11, 15), in determining the phase of an individual's infection (16, 17)  
50 and predicting disease severity (16, 18).

51 Using viral loads for clinical and epidemiological purposes requires an understanding of the viral  
52 load kinetics over the course of infection. For SARS-CoV-2, this has not been fully characterized  
53 due to difficulties in quickly identifying and repeatedly testing asymptomatic infections. However,  
54 many salient features of the viral load trajectory have been identified using rhesus macaque  
55 models and longitudinal human studies with repeated sampling after symptom onset (19–25).

56 From these properties, assessments of infectiousness over the course of infection (5, 26) and  
57 population-level viral load distributions by time since infection can be reconstructed (27).

58 While individual viral load kinetic trajectories may potentially be used to diagnose the clinical  
59 course of infection and determine requirements of test sensitivities (27), albeit with caveats from  
60 sampling variability and different testing platforms, population-level viral loads can be used for  
61 epidemiological assessments of an outbreak. Sample surveys with virologic tests provide cross-  
62 sectional estimation of the prevalence of infection, and repeated surveys can provide information  
63 on the trends in prevalence and incidence over time (28). Population-level signals in  
64 measurements obtained under the same sampling protocol and using the same instrument will  
65 therefore reflect underlying epidemiological trends. However, a consistently observed but  
66 currently unexplained phenomenon is that, as the epidemic declines, the distribution of observed  
67 Ct values above the limit of detection appears to systematically decline (15, 16).

68 Previous work has used serologic data to infer unobserved individual-level infection events and  
69 population-level parameters of infectious disease spread. In particular, antibody dynamics have  
70 been used in tools to identify the infecting strain for multi-strain pathogens (29, 30) and to identify  
71 the time since infection for an individual (31, 32). At the population level, repeated sampling of  
72 antibody levels has been used to identify seasonal forcing mechanisms for recurrent epidemics  
73 (33), estimate an average incidence rate (34–37), and identify the force of infection at various  
74 time points (32, 38). Although virologic data may exhibit more heterogeneity than serological data,  
75 they similarly provide single point-in-time observations of underlying within-host infection kinetics.  
76 Here, we use virologic data, which can be obtained sooner after infection than antibody titers, to  
77 provide real-time monitoring of epidemic dynamics, and demonstrate an approach using a single  
78 cross-sectional survey.

79 In this paper, we show that the changing population distribution of Ct values obtained from positive  
80 SARS-CoV-2 samples can be used to infer epidemic dynamics. Early in the epidemic, infection  
81 numbers are growing rapidly and the average infection is recent; as the epidemic wanes,  
82 however, average time since exposure increases as the rate of new infections decreases—  
83 analogous to the average age being lower in a growing vs. declining population of organisms (39).  
84 Importantly, within infected hosts, Ct values change over time: the viral population undergoes  
85 rapid exponential growth after inoculation, succeeded by slower exponential decline as the  
86 infection is cleared and low levels of viral RNA persist. Surveillance sampling of infected  
87 individuals during epidemic growth is therefore more likely to measure individuals who were

88 recently infected and therefore in the acute phase of their infection. Conversely, sampling infected  
89 individuals during epidemic decline is more likely to capture individuals in the convalescent phase,  
90 typically sampling lower quantities of viral RNA. We first demonstrate that rate of transmission is  
91 highly correlated with the distribution of detectable Ct values in infected individuals over time using  
92 both simulated and real data from Massachusetts. We then formalize this intuition into a novel  
93 and robust method able to use viral load measurements (i.e., RT-qPCR Ct values or other forms  
94 of virus quantitation) from single cross-sectional virologic test surveys to determine an  
95 instantaneous outbreak trajectory, without need for repeated measures.

## 96 Results

### 97 *Relationship between observed Ct values and epidemic dynamics*

98 To first demonstrate how the distribution of observed Ct values changes over the course of an  
99 outbreak, we simulate viral load trajectories from infections arising under a deterministic  
100 susceptible-exposed-infectious-recovered (SEIR) model (**Fig. 1A**). At each day of the outbreak,  
101 Ct values are observed from a random sample of the population using the population-level Ct  
102 distribution model described in *Materials and Methods* and shown in **Fig. S1**. Assumed parameter  
103 values for the distribution of Ct values for a given time since infection are the point estimates in  
104 **Table S1**, capturing individual-level time courses of viral kinetics post infection and the substantial  
105 variation in observations resulting from individual variation and sampling differences. By drawing  
106 simulated samples for testing from across the population at specific time points, these simulations  
107 recreate realistic cross-sectional distributions of detectable viral loads across the course of an  
108 epidemic.

109 Throughout the course of the outbreak, shown in **Fig. 1**, there is a strong relationship between  
110 growth rate of new infections at each timepoint, the cross-sectional distribution of time since  
111 infection of RT-qPCR-detectable infections at that time point, and distribution of detectable viral  
112 loads in the simulated SEIR population at that time point. To infer epidemic growth rate, we would  
113 ideally observe the distribution of time since infection of infected individuals, because it is directly  
114 related to the average growth rate when those individuals were infected (**Fig. 1A-C**). However,  
115 because infections are often unobserved events, we rely on an observable quantity, such as viral  
116 load, as a proxy for the time since infection (**Fig. 1D-G**). Throughout, we assume that there is a  
117 single infection time for each individual and ignore re-infection, as it appears to be a negligible  
118 portion of infections in the epidemic so far (40).

119 Since the viral load is related to time since infection for each individual (**Fig. 1D**), and the average  
120 time since infection varies over the outbreak (**Fig. 1C**), the distributional properties of the  
121 measured viral loads (i.e., median and skewness) vary with the growth rate of new cases (**Fig.**  
122 **1H, Fig. S2**). Across individuals, this relationship holds, even after accounting for significant  
123 individual level variation in peak viral loads and growth/clearance kinetics and errors in quantifying  
124 viral load. This relationship holds for any observation model (i.e., using a different RT-qPCR  
125 instrument or in a different lab); if the distribution of observations is an estimable function of the  
126 distribution of times since infection (which it is), then the expected median and skewness of  
127 observations at a given point in time are predictable from the growth rate.

128 *Demonstration using simulated data*

129 We used our simulation framework to investigate how properties of the Ct distribution relate to  
130 the effective reproductive number,  $R(t)$ , if observed in a population similar to Massachusetts, USA.  
131 Here,  $R(t)$  is used essentially as a reflection of the growth, or decay, of the epidemic in time. We  
132 find that both the median Ct (which would vary with the individual assay) as well as the skewness  
133 of the Ct distribution (which would be largely test- and lab-agnostic) show a strong correlation with  
134  $R(t)$  (**Fig. 2**); as  $R(t)$  declines, the median Ct of sampled individuals increases and, notably, the  
135 distribution becomes more negatively skewed. An important caveat for this comparison is that  
136  $R(t)$  is the effective reproductive number on that day, whereas Ct values are observed from  
137 infections generated across many days in the past.

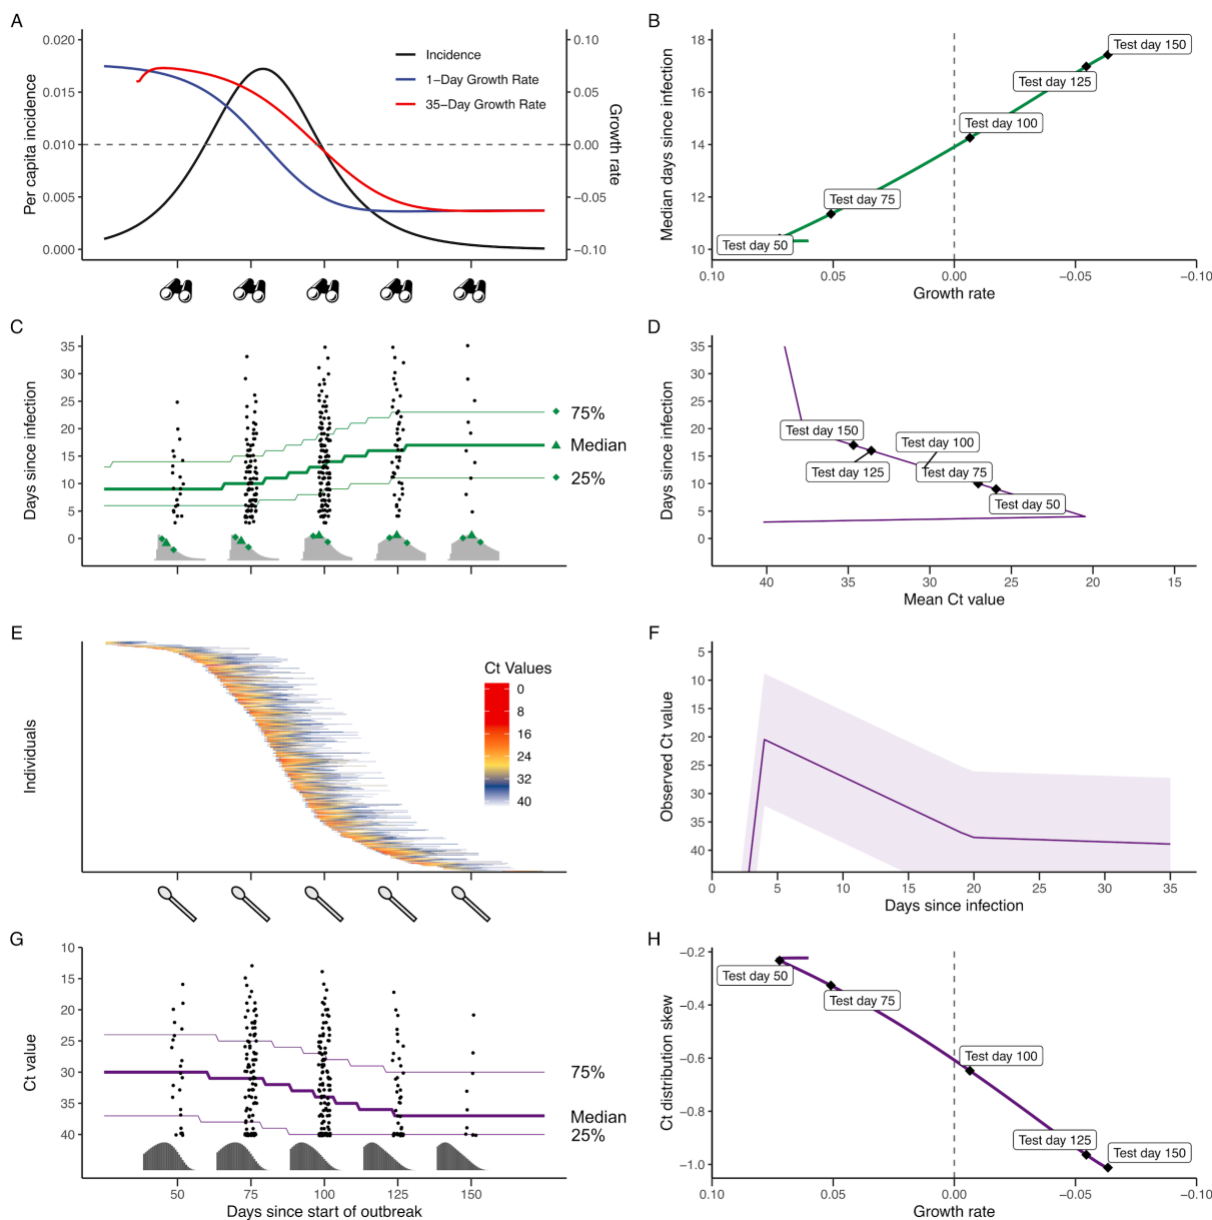

138

139 **Figure 1. (A)** Simulated per capita incidence, daily growth rate, and average growth rate over the preceding  
 140 35 days of detectable infections. Binocular symbols represent observation times used in subsequent plots.  
 141 **(B)** Relationship between growth rate as it varies over the epidemic and the median time since infection.  
 142 **(C)** Distribution of times since infection for observed, detectable infections at 50, 75, 100, 125, and 150  
 143 days after the epidemic start (histograms) and daily median (thick green line) and central 50% percentiles  
 144 for time since infection. **(D)** Modeled mean viral kinetics on each day post infection. Labels show mean Ct  
 145 value corresponding to the median time since infection at different points along the epidemic curve. **(E)**  
 146 Simulated RT-qPCR cycle threshold (Ct) value trajectories of 500 individuals randomly sampled from the  
 147 epidemic. Swab symbols represent sampling times. **(F)** Modeled viral kinetics showing median Ct value  
 148 (purple line) and 95% quantiles on simulated observations. **(G)** Distribution of observed, detectable  
 149 Ct values at each of the five test days (histograms) and median and central 50% percentiles (thick and thin  
 150 lines, respectively) on Ct values observed over time. **(H)** between growth rate and the skew of the



151 observable Ct distribution. All results are based on an SEIR model in a population of 1,000,000 with  $R_0 =$   
152 2.5, average latent period of 6.41 days, and average infectious period of 8.79 days, and Ct values were  
153 simulated based on inferred post-infection viral kinetics. In **E**, for visual simplicity, each individual's Ct  
154 values are assumed to follow the same post-infection trajectory with only a shift in the mean; this  
155 assumption is not used elsewhere in this paper.

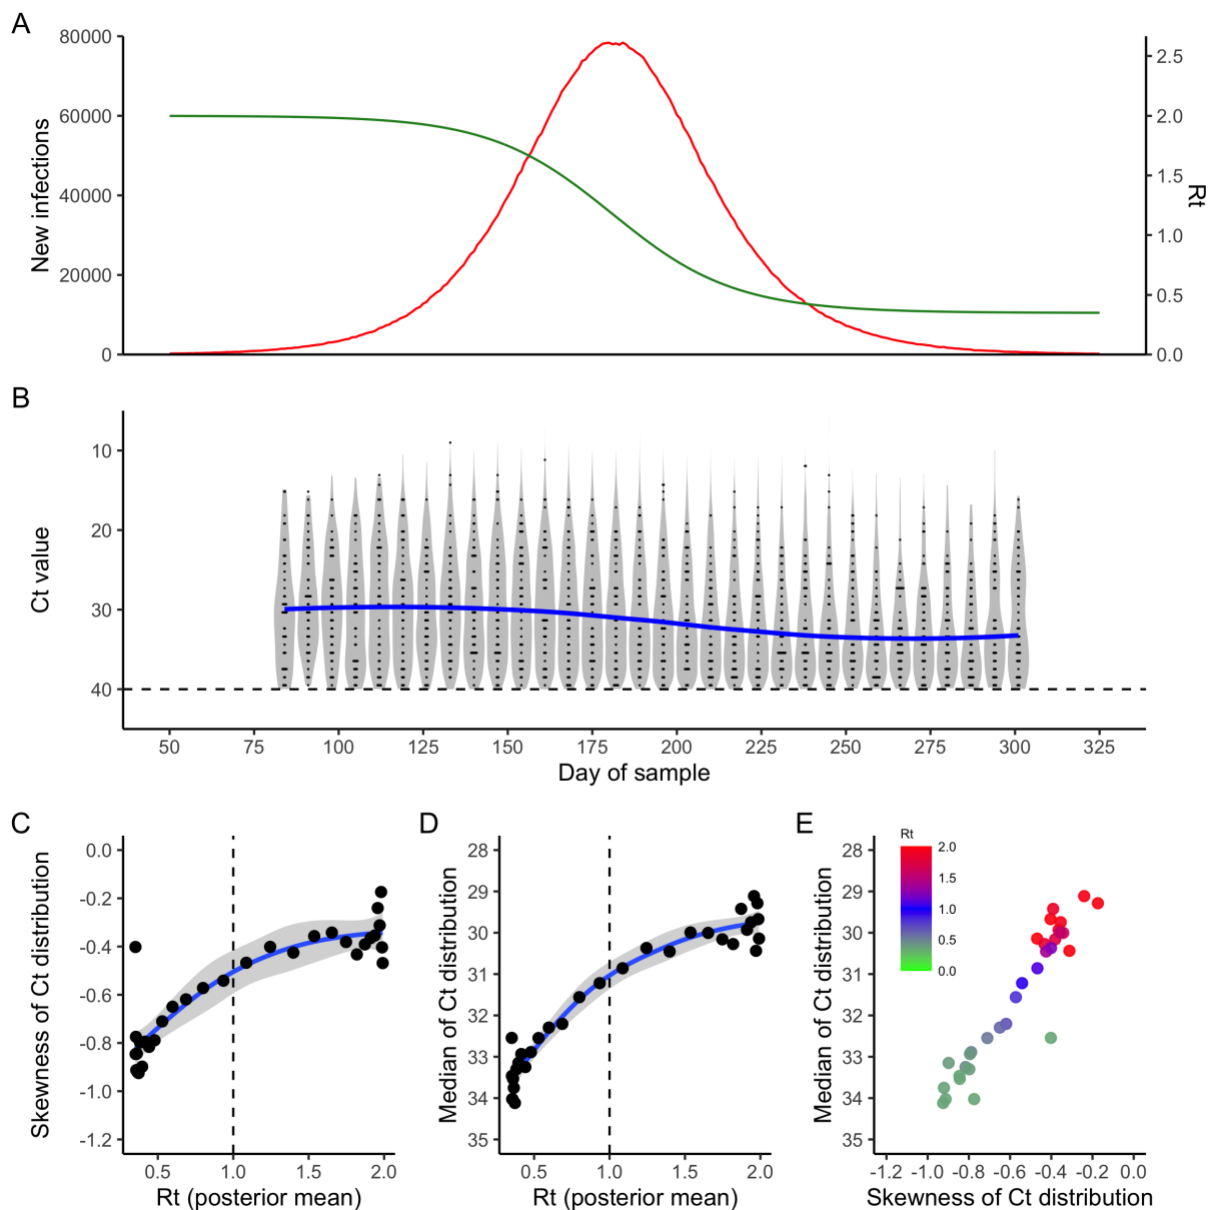

156

157 **Figure 2. (A)** Simulated incidence of new infections (red) and corresponding effective reproductive number  
158 over time,  $R(t)$  (green). **(B)** Weekly distribution of positive (detectable) Ct values. The blue line shows the  
159 smoothed median, the dotplot shows a subset of the observed, binned Ct values, and the violin plot shows  
160 densities. **(C&D)** Relationship between the skewness and median of the observed Ct distribution and the  
161 mean  $R(t)$  per week. Blue line and shaded region shows fitted smoothing spline +/- 1 standard error. Only  
162 weeks with more than 10 detectable Ct values are shown. **(E)** Plotted together, the median and skewness  
163 of the observed Ct distribution display a strong correlation with  $R(t)$  (color of point) per week.

164 *Observation of trends in Ct values from a major tertiary care hospital in Massachusetts*

165 To investigate if our predicted relationship between the distribution of Ct values and  $R(t)$  is borne  
166 out in reality, we used fully anonymized Ct values measured from nearly all hospital admissions  
167 into Brigham & Women's Hospital in Boston, MA, between April 3 and August 31, 2020, and  
168 aligned them with estimates for  $R(t)$  based on case counts in Massachusetts. Tests taken prior to  
169 April 3 were restricted to symptomatic patients only, while those after April 15 represented  
170 universal testing of all hospital admission, regardless of symptomatology. The median and  
171 skewness of the Ct distribution both dropped during this period, strikingly similar to our predictions  
172 for the peak and subsequent decline of an epidemic. Although the trend was the same, properties  
173 of the Ct distribution exhibited higher variation across weeks, likely resulting from changes in  
174 transmission intensity (e.g., due to the implementation of and adherence to interventions), small  
175 sample sizes in some weeks, and potential sampling bias. In particular, it is important to note that  
176 sampling was initially biased in early April towards symptomatic individuals, resulting in more  
177 individuals being sampled near the peak of their viral loads (i.e., symptom onset), and therefore  
178 skewing the Ct distribution towards lower values. Indeed, we were able to recreate this positive  
179 skew by simulating observed Ct values with early biased sampling towards symptomatic  
180 individuals (**Fig. S3**). Nevertheless, the relationship held. Importantly for monitoring potential, the  
181 relationship demonstrated slight reductions in median Ct (increases in median viral load) and  
182 slightly reduced negative skew as cases, and thus estimated  $R(t)$ , began to increase again in the  
183 state in July (**Fig. 3**).

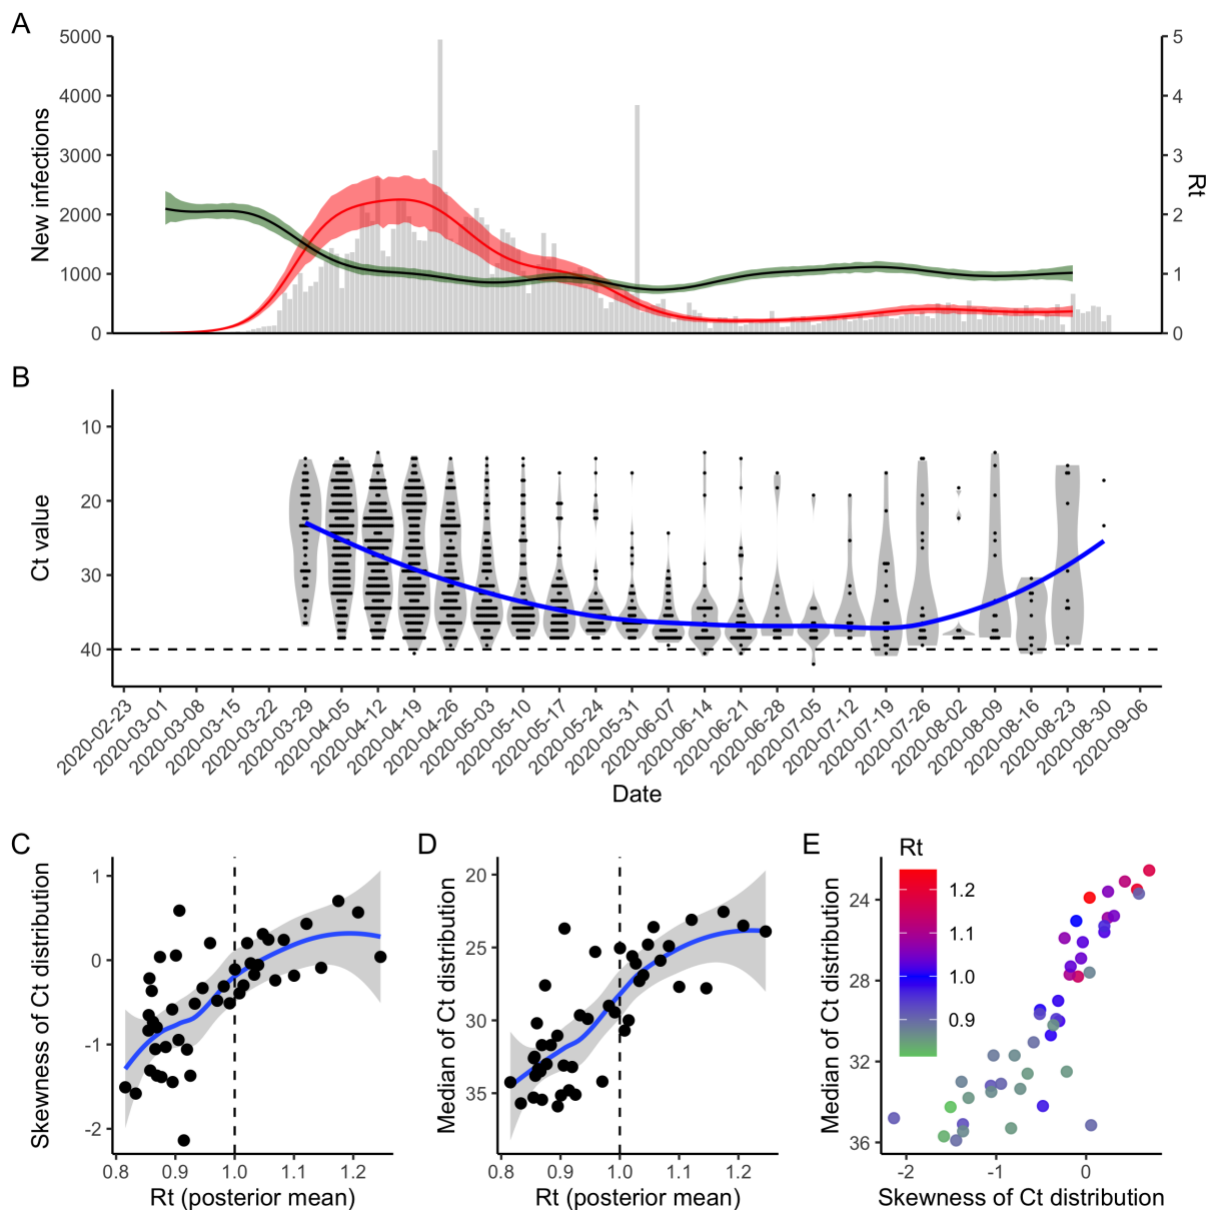

184

185 **Figure 3. (A)** Estimates of the effective reproductive number,  $R(t)$  (black line and green area), based on  
 186 the daily incidence of new cases in Massachusetts (grey bars). We used the *EpiNow2* package (see  
 187 Materials and Methods), which uses a Bayesian approach to first back-calculate incidence by date of  
 188 infection (red line and region) and subsequently infer  $R(t)$ . Shaded regions show 95% credible intervals and  
 189 solid lines show posterior means. **(B)** Weekly distribution of positive (detectable) Ct values from Brigham &  
 190 Women's Hospital in Boston, MA. The blue line shows the smoothed median, the dotplot shows the  
 191 observed, binned Ct values, and the violin plot shows densities. **(C&D)** Relationship between the skewness  
 192 and median of the observed Ct distribution per day against the posterior mean daily  $R(t)$ . Blue line and  
 193 shaded region shows fitted smoothing spline  $\pm$  1 standard error. Only days with more than 10 detectable  
 194 Ct values are shown. **(E)** As in **Fig. 2**, the median and skewness of the observed Ct distribution can be  
 195 combined to demonstrate a strong correlation with  $R(t)$  (color of point) per day.

196 *Epidemic growth rates can be inferred based on cross-sectional viral load data*

197 Next, we derive a method to formally infer the epidemic growth rate given a single cross-section  
198 of observed, detectable Ct values. If the population-level distribution of Ct values on each day  
199 post infection is known, then the distribution of observed Ct values from a largely random sample  
200 of infected individuals will reflect their times since infection, which in turn reflects the growth rate  
201 when those individuals were infected. The likelihood of the observed viral loads can then be  
202 written as a function of the growth rate (*Materials and Methods*), allowing estimation of the  
203 average growth rate at any time point in the outbreak. In many cases, especially for a novel  
204 infection such as SARS-CoV-2, the population-level dynamics of viral loads and the resulting  
205 distribution of Ct values following infection may not be known with certainty. However, available  
206 data and qualitative understanding can be sufficient to define Bayesian priors for estimating key  
207 viral kinetics parameters. We therefore developed a Bayesian framework to incorporate uncertain  
208 prior distributions on the population-level Ct distribution as well as on the growth rate.

209 Using the same simulated population as in **Fig. 2**, we fit the model to cross-sectional samples at  
210 5 day intervals using the Bayesian priors in **Table S1**. These analyses demonstrate how a  
211 single cross-sectional sample of individuals may be used to estimate properties of the outbreak.  
212 **Fig. 4A** shows the posterior growth rate estimates alongside the true growth rate at each time  
213 point. The credible interval widths reflect the number of detectable Ct values included in each  
214 cross-section, and also uncertainty in the viral kinetics and Ct distribution parameters. Larger  
215 sample sizes than we drew here and stronger accurate priors would help constrain these  
216 estimates. However, with large uncertainties incorporated in this particular version of the  
217 framework, the method was still able to discern if the growth rate was positive or negative, even  
218 if the point estimates were imprecise (**Fig. 4B**). **Fig. 4C and 4D** demonstrates how the model is  
219 fitted to the observed Ct distribution and the corresponding time-since-infection distribution for  
220 individuals observed on a particular day.

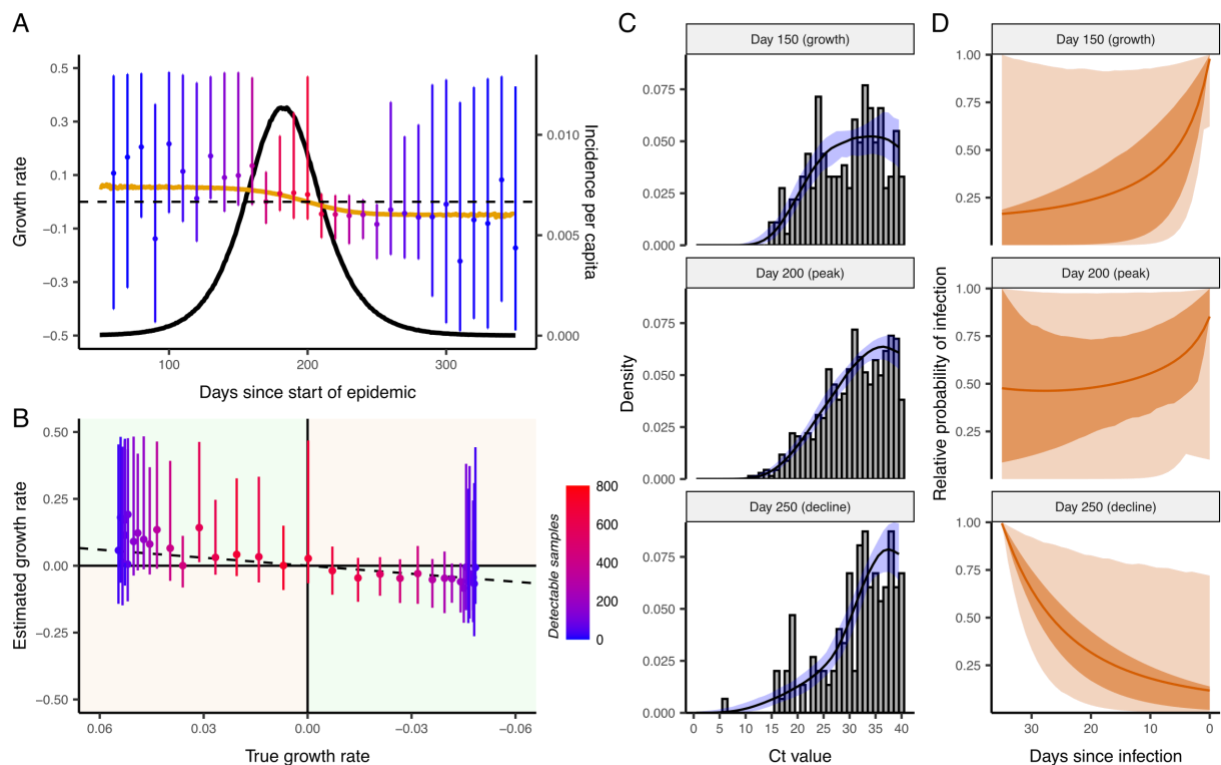

221

222 **Figure 4. (A)** Epidemic growth models independently fit to cross sections at 5-day intervals. The black line  
 223 shows infection incidence. The orange line shows the average growth rate over the 35 days preceding each  
 224 day. The pointrange plot shows the posterior median and 95% credible intervals (CIs) of the average growth  
 225 rate estimated on that day. Points are colored by the number of detectable Ct values used for fitting. **(B)**  
 226 Posterior growth rate estimates against true 35-day average growth rates. Dashed line shows the 1:1 line.  
 227 Points and ranges show posterior medians and 95% CIs respectively. **(C)** Model-predicted Ct distributions  
 228 (line and blue shaded region) fitted to the observed Ct distribution (histogram) during epidemic growth, peak  
 229 and decline phases. Black line and blue region show posterior median and 95% CIs. **(D)** Posterior estimates  
 230 for the relative time since infection distribution during epidemic growth, peak and decline phases. Light  
 231 shaded region shows 95% CIs, dark shaded region shows central 95% CIs, and solid line shows posterior  
 232 mean. Note that the x-axis is reversed, such that the left hand side shows older infections and the right  
 233 hand side shows more recent infections.

## 234 Discussion

235 The usefulness of Ct values for public health decision making is currently the subject of much  
236 discussion and debate. One unexplained observation which has been consistently observed in  
237 many locations is that the distribution of observed Ct values has decreased over the course of  
238 the current SARS-CoV-2 pandemic, which has led to questions over whether the virus has lost  
239 some amount of fitness (15, 16, 18). Our results demonstrate instead that this is expected as a  
240 purely epidemiologic phenomenon, without any change in individual-level viral dynamics or testing  
241 practices. We find that properties of the population-level Ct distribution strongly correlate with  
242 estimates for the effective reproductive number in Massachusetts in line with our theoretical  
243 predictions. The method described here uses this phenomenon to estimate a community's  
244 position in the epidemic curve, as defined by the growth rate, based on a single cross-sectional  
245 survey of virologic test data. We propose a simple method to monitor the skewness and median  
246 of the Ct value distribution to estimate changes in the epidemic trajectory. Despite the challenges  
247 of sampling variability, individual-level differences in viral kinetics, and limitations in comparing  
248 results from different laboratories or instruments, our results demonstrate that Ct values, with all  
249 of their quantitative variability for an individual, can be highly informative of population-level  
250 dynamics. This information is lost when measurements are reduced to binary classifications.

251 These results are sensitive to the true distribution of observed viral loads each day after infection.  
252 Different swab types, sample types, or instruments may alter the variability in the Ct distribution  
253 (41,42), leading to different relationships between the specific Ct distribution and the epidemic  
254 trajectory. Setting-specific calibrations, for example based on a reference range of Ct values, will  
255 be useful to ensure accuracy. Here, we generated a viral kinetics model based on observed  
256 properties of measured viral loads (proportion detectable over time following symptom onset,  
257 distribution of Ct values from true specimens), and used these results to inform priors on key  
258 parameters when estimating growth rates. The growth rate estimates can therefore be improved  
259 by choosing more precise, accurate priors relevant to the observations used during model fitting.  
260 Results could also be improved if the symptom status of the sampled individuals is known,  
261 allowing the inclusion of viral kinetics parameters specific to symptomatic individuals (16, 43). The  
262 same may be true if demographic features such as age are associated with viral load levels,  
263 although there is limited evidence to suggest this so far (16, 18, 24, 44). The distribution could  
264 also be adjusted to account for any individuals treated with antivirals, such as remdesivir, that  
265 may reduce viral loads (45). A similar approach may also be possible using serologic surveys, as

266 an extension of work that has related time since infection to antibody titers for other infectious  
267 diseases (32, 38).

268 Our results demonstrate that this method can be used to estimate epidemic growth rates based  
269 on data collected at a single time point, and independent of assumptions about the intensity of  
270 testing. Comparisons of simulated Ct values and observed Ct values with growth rates and  $R(t)$   
271 estimates validate this general approach. Results should be interpreted with caution in cases  
272 where the observed Ct values are not from a population census or a largely random sample.  
273 When testing is based primarily on the presence of symptoms or follow-up of contacts of infected  
274 individuals, people may be more likely to be sampled at specific times since infection and thus  
275 the distribution of observed Cts would not be representative of the population as a whole. This  
276 method may be most useful in settings where representative surveillance samples can be  
277 obtained independent of COVID-19 symptoms—and importantly in cities or municipalities that  
278 wish to evaluate and monitor, in real-time, the role of various epidemic mitigation interventions,  
279 for example by conducting even a single random virologic testing effort as part of surveillance.

280 This method has a number of limitations. While the Bayesian framework incorporates the  
281 uncertainty in viral load distributions into inference on the growth rate, parametric assumptions  
282 and reasonably strong priors on these distributions aid in identifiability. If these parametric  
283 assumptions are violated, inference may not be reliable. This method may also overstate  
284 uncertainty in the viral load distributions if results from different machines or protocols are used  
285 to inform the prior. A more precise understanding of the viral load kinetics, and modeling those  
286 kinetics in a way that accounts for the epidemiologic and technical setting of the measurements,  
287 will help improve this approach and determine whether Ct distribution parameters from different  
288 settings are comparable. Because of this, quantitative measures from RT-qPCR should be  
289 reported regularly for SARS-CoV-2 cases and early assessment of pathogen load kinetics should  
290 be a priority for future emerging infections. The use of a control procedure in the measurements,  
291 like using the ratio of detected viral RNA to detected human RNA, could also improve the reliability  
292 and comparability of Ct measures.

293 Future research will evaluate how to incorporate these results into an overall inferential framework  
294 for real-time monitoring of epidemic trajectories. In particular, we are currently adapting the  
295 framework to combine multiple cross-sectional datasets, include the proportion of negative viral  
296 tests in the likelihood, and to use more flexible parametric assumptions for epidemic growth. By  
297 using Ct values to determine the growth rate of incident cases and using virologic positivity rates



298 to assess prevalence of infection, as well as potentially incorporating measured covariates and  
299 symptom status, a richer picture of the path and likely future of an outbreak can be realized from  
300 one or more virologic surveys.

301 The Ct value is a measurement with magnitude, which provides information on underlying viral  
302 dynamics. Although there are challenges to relying on single Ct values for individual-level decision  
303 making, the aggregation of many such measurements from a population contains substantial  
304 information. These results demonstrate how population-level distributions of Ct values can  
305 provide information on important epidemiologic questions of interest, even from a single cross-  
306 sectional survey. Better epidemic planning and more targeted epidemiological measures can then  
307 be implemented based on this survey, or use of Ct values can be combined with repeated  
308 sampling to maximize the use of available evidence.

## 309 **Materials and Methods**

### 310 *Model for Population-Level Ct Distribution*

311 We fit a model for the distribution of viral loads at a given day after infection,  $a$ . Denote this density  
312 by  $p_a(x)$ , where  $x$  is the viral load. We denote by  $\phi_a$  the probability that an individual will have a  
313 detectable viral load  $a$  days after infection.

314 This model is fit based on several key features of the viral load kinetics that have been determined  
315 for SARS-CoV-2 infection. In symptomatic cases, detectable viral loads occur prior to the onset  
316 of symptoms and generally decline after symptom onset (19, 46, 47). Since infectiousness  
317 appears to peak before symptom onset, viral load likely does as well (26). Challenge studies in  
318 rhesus macaques indicate that viral load peaks around 2 days after infection (22, 23). Combined  
319 with evidence of an incubation period in humans of around 5 days (5), these observations suggest  
320 rapid exponential rise to a peak viral load during the incubation period and a high viral load upon  
321 symptom onset of approximately 6–9 log<sub>10</sub> copies RNA per mL (19, 25). However, most existing  
322 viral load time series begin after symptom onset, and it is therefore difficult to corroborate  
323 assumptions for the pre-symptomatic period. Waning of viral loads occurs following symptom  
324 onsets, with a majority of patients undetectable around 24 days after onset (19, 20, 24, 25). At  
325 any point in the infection, there is a considerable amount of person-to-person variation in viral  
326 loads (19, 25), including a possible difference by symptom status (20, 48). This may also reflect  
327 protocols used to test the samples and the site and method of sample collection (25).

328 We develop a parametric model for the population-level distribution of Ct values. The measured  
329 Ct value  $a$  days after infection follows a Gumbel distribution with a mean that depends on  $a$  and  
330 a fixed standard deviation  $SD$ . The mean log-viral load at day  $a$  follows a two-hinge function that  
331 is at the true zero value of  $VL_{zero}$  for  $a \leq t_{shift}$ , rises linearly to a peak log-viral load of  $VL_{peak}$  at  
332  $a = t_{peak}$ , wanes linearly to a log-viral load of  $VL_{switch}$  at  $a = t_{switch}$ , and then wanes at a slower  
333 linear rate until it reaches the limit of detection (LOD), a log-viral load of  $VL_{LOD}$  at  $a = t_{LOD}$ . That  
334 is, the mean log-viral load is given by:

$$\begin{aligned} 335 \quad VL_{mean}(a) = & VL_{zero} + I_{a > t_{shift}} \frac{VL_{peak} - VL_{zero}}{t_{peak} - t_{shift}} (a - t_{shift}) + I_{a > t_{peak}} \frac{VL_{switch} - VL_{peak}}{t_{switch} - t_{peak}} (a - t_{peak}) \\ 336 \quad & + I_{a > t_{switch}} \frac{VL_{LOD} - VL_{switch}}{t_{LOD} - t_{switch}} (a - t_{switch}). \end{aligned}$$

337 The log-viral load is converted to a Ct value by:  $Ct_{mean}(a) = Ct_{LOD} - \log_2(10) (VL_{mean}(a) -$   
 338  $VL_{LOD})$  where the limit of detection on the Ct scale is  $Ct_{LOD} = 40$  and on the viral load scale is  
 339  $VL_{LOD} = 3$ . The Ct value at  $a$  days after infection,  $Ct(a)$ , is then distributed according to  $p_a(Ct)$ , a  
 340 Gumbel distribution with mean  $Ct_{mean}(a)$  and variance  $SD^2$ . This model captures the shape of  
 341 the observed mean viral load over time and the features described above. However, it  
 342 overestimates the proportion of infections that will be detectable three weeks or more after  
 343 infection. To account for this, each day after  $t_{switch}$ , we add an additional probability,  $p_{add}$ , that an  
 344 individual will clear the virus and become undetectable for that day forward, in addition to the  
 345 probability that the Ct value rises above the limit of detection. So the probability of being  
 346 detectable on day  $a \leq t_{switch}$  is  $\phi_a = P[Ct(a) \leq Ct_{LOD}]$  and the probability of being detectable on  
 347 day  $a > t_{switch}$  is  $\phi_a = P[Ct(a) \leq Ct_{LOD}](1 - p_{add})^{a-t_{switch}}$ .

348 We used a least-squares optimization framework to obtain parameter point estimates that gave  
 349 rise to viral kinetics with the following constraints: the proportion of individuals that are detectable  
 350 on each day post symptom onset declines in line with existing data (49), and the lower 99<sup>th</sup>  
 351 percentile of possible Ct values is in line with the lowest observed Ct value in our Brigham &  
 352 Women's Hospital dataset. We used these point estimates to derive informative priors on key  
 353 model parameters, as described in **Table S1**. The resulting distribution of Ct values and  
 354 detectable proportions at each day  $a$  after infection are shown in **Fig. S1**. These parameters are  
 355 used as fixed parameters for the schematic (**Fig. 1**).

### 356 *Likelihood for Parametric Model of Outbreak Trajectory*

357 Given a known population-level Ct distribution for each day after infection and a known  
 358 detectable probability,  $p_a(x)$  and  $\phi_a$ , respectively, we can determine the likelihood of the  
 359 probability of infection  $a$  days prior to the test day,  $\pi_a$ , for all  $a$  with a positive probability of  
 360 detectable viral load, given the observed detectable viral loads  $x_1, \dots, x_n$ . Let  $\{A_{min}, \dots, A_{max}\}$   
 361 denote the days with a positive probability of detectable viral load, so that an individual with a  
 362 detectable viral load must have been infected between  $A_{max}$  and  $A_{min}$  days prior to testing. We  
 363 further assume that each individual's viral load is independent of the viral load of other  
 364 individuals in the sample, conditional on the probability of infection for each day.

$$365 \quad P(X_i = x_i | \pi_{A_{min}}, \dots, \pi_{A_{max}}) = \sum_{a=A_{min}}^{A_{max}} \frac{p_a(x_i) \pi_a}{\sum_{c=A_{min}}^{A_{max}} \phi_c \pi_c}.$$

366 Thus, the likelihood and log-likelihood, respectively, are given by:

367  $L(\pi_{A_{min}}, \dots, \pi_{A_{max}} | X_1 = x_1, \dots, X_n = x_n) = \prod_{i=1}^n \sum_{a=A_{min}}^{A_{max}} \frac{p_a(x_i) \pi_a}{\sum_{c=A_{min}}^{A_{max}} \phi_c \pi_c}$ , and

368  $l(\pi_{A_{min}}, \dots, \pi_{A_{max}} | X_1 = x_1, \dots, X_n = x_n) = \sum_{i=1}^n \left\{ \log \left[ \sum_{a=A_{min}}^{A_{max}} p_a(x_i) \pi_a \right] - \right.$

369  $\left. \log \left[ \sum_{c=A_{min}}^{A_{max}} \phi_c \pi_c \right] \right\}$ .

370

371 Assume that the outbreak, over the days prior to testing, is experiencing exponential growth or  
372 decline of the daily probability of infection. Then for each day  $a \in \{A_{min}, \dots, A_{max}\}$ ,  $\pi_a =$

373  $\frac{e^{-\beta a}}{\sum_{d=A_{min}}^{A_{max}} e^{-\beta d}}$ . Note that  $\beta > 0$  implies a growing outbreak,  $\beta < 0$  a waning outbreak, and  $\beta = 0$

374 a flat outbreak with a constant probability of infection across the days prior to testing. Then the  
375 likelihood and log-likelihood for  $\beta$  given the observed viral loads are:

376 
$$P(X_1 = x_1, \dots, X_n = x_n | \beta) = \prod_{i=1}^n \sum_{a=A_{min}}^{A_{max}} \frac{p_a(x_i) e^{-\beta a}}{\sum_{c=A_{min}}^{A_{max}} \phi_c e^{-\beta c}}$$

377 
$$l(\beta | X_1 = x_1, \dots, X_n = x_n) = \sum_{i=1}^n \left\{ \log \left[ \sum_{a=A_{min}}^{A_{max}} p_a(x_i) e^{-\beta a} \right] - \log \left[ \sum_{c=A_{min}}^{A_{max}} \phi_c e^{-\beta c} \right] \right\}$$

378 More flexible parametric models can be used, including assuming piecewise exponential growth  
379 or that the probability of infection on each day follows some other function. In these cases, the  
380 parametric model for  $\pi_a$  is simply used in place of  $e^{-\beta a}$  in this likelihood and log-likelihood.

381 Additionally, nonparametric estimation can be performed by maximizing the likelihood in terms  
382 of  $\pi_a$  directly for  $a \in \{A_{min}, \dots, A_{max}\}$ . This approach, however, will likely give very high  
383 variance unless there is a large sample size and the viral distribution has a small variance  
384 compared to the trend in the mean over time.

### 385 *Bayesian Framework for Estimation and Inference*

386 To incorporate uncertainty in the distribution of viral loads on each day after infection, we  
387 construct a Bayesian framework for estimation and inference. A prior distribution is specified for  
388  $\beta$  (or the set of parameters used in the likelihood) as well as for the viral load distributions,  $p_a(x)$ .  
389 The prior for the viral load distributions can be specified in many ways, but we here

390 parameterize these distributions by a mean and standard deviation for each day  $a$  and assume  
391 a normal distribution with those parameters, so the prior is specified on the mean and standard  
392 deviation. This prior can be based on existing studies of viral load kinetics after infection and  
393 can also take into account specific properties of the sample collection procedure, PCR  
394 protocols, and machine used to analyze the samples, if known. Estimation and inference can  
395 then proceed on the posterior distribution.

396 The prior distributions used here are listed in **Table S1**. The prior distribution for  $\beta$  is taken to be  
397 normal with mean 0 and standard deviation 0.1. Note that  $\beta = 0.4$  corresponds to a doubling  
398 time of 1.73 days, so value of  $\beta$  above 0.4 or below -0.4 would be highly unusual for SARS-  
399 CoV-2.

400 To assess the outbreak trajectory, interest lies in the marginal posterior distribution of  $\beta$ . A  
401 larger positive value of  $\beta$  indicates a faster-growing outbreak and a more negative value of  
402  $\beta$  indicates a faster-waning outbreak. The posterior distribution of the  $p_a(x)$  parameters are  
403 nuisance parameters for this goal, but may provide useful information for the prior distributions  
404 of  $p_a(x)$  in future studies in similar settings.

#### 405 *Simulated Data*

406 For **Fig. 1**, outbreaks are simulated according to a deterministic SEIR model with a population of  
407 1,000,000 people,  $R_0=2.5$ , average latent period of 6.41 days, and average infectiousness period  
408 of 8.79 days. The latent and infectiousness periods are based on the best fit SEIR models for the  
409 observed prevalences in Massachusetts nursing home data (not shown) and align fairly well with  
410 the viral load kinetics implied by the Ct distribution model and with parameters reported elsewhere  
411 (5, 50).

412 For **Figs. 2 and 4**, outbreaks are simulated according to a stochastic SEIR model with a population  
413 of 6,900,000 people, an initial seed of 100 infected individuals,  $R_0=2$ , average latent period of  
414 6.41 days, and average infectiousness period of 8.79 days as above. We used the *odin* R package  
415 for simulation (<https://cran.r-project.org/web/packages/odin/index.html>). To simulate cross-  
416 sectional sampling, we assumed that 20% of the population was randomly sampled once during  
417 the outbreak, which led to approximately 4,000 individuals being sampled and tested per day.  
418 Each infected individual is then assigned an observed Ct value on the day of sampling using the  
419 viral kinetics model described in *Model for Population-Level Ct Distribution*, with added  
420 observation error drawn from a Gumbel distribution with a standard deviation of 6. **Fig. S3** is

421 generated in the same way, but with additional samples taken from symptomatic individuals. We  
422 assumed that 35% of infections became symptomatic, and that symptomatic individuals had a  
423 10% probability of being detected. Detected, symptomatic individuals were observed with some  
424 delay post symptom onset drawn from a discretized gamma distribution with shape and rate  
425 parameters of 5 and 2 respectively (mean and standard deviation of 2.5 and 1 days respectively).

#### 426 *Brigham & Women's Hospital data, Boston, Massachusetts*

427 Data comes from nasopharyngeal specimens processed on a Hologic Panther Fusion SARS-  
428 CoV-2 assay for patients at the Brigham & Women's Hospital in Boston, MA. Testing during the  
429 first two weeks in April 2020 were restricted to patients with symptoms consistent with COVID-19  
430 and who needed hospital admission. Following April 15, testing criteria were expanded to include  
431 all hospital admissions regardless of symptoms and asymptomatic ER patients who were not  
432 admitted. The results were from individuals entering the hospital for non-COVID procedures and  
433 thus represent less biased surveillance specimens. Daily data is aggregated by week. Daily  
434 confirmed case counts for Massachusetts were obtained from the NYT github page  
435 (<https://github.com/nytimes/covid-19-data>) (51).

#### 436 *Estimating the effective reproductive number, $R(t)$*

437 We used the *EpiNow2* R package for all  $R(t)$  estimates  
438 (<https://github.com/epiforecasts/EpiNow2>). The package estimates the time-varying reproduction  
439 number using the MCMC package *Stan* ([https://cran.r-](https://cran.r-project.org/web/packages/rstan/index.html)  
440 [project.org/web/packages/rstan/index.html](https://cran.r-project.org/web/packages/rstan/index.html)), incorporating best practices in  $R(t)$  estimation as  
441 described by Gostic et al. (52–54). The package takes a time series of confirmed case counts as  
442 input, and returns posterior distribution estimates on the daily effective reproductive number.  
443 *EpiNow2* simultaneously infers  $R(t)$  and infection incidence using a method based on the Cori  
444 method. We assumed that the confirmation delay distribution was log normally distributed with a  
445 mean of 3 (on the linear scale) and standard deviation of 0.5 (on the log scale) days. We assumed  
446 that the generation interval and incubation period were uncertain, using the default values  
447 provided by the *EpiNow2* package. The mean and standard deviation of the generation interval  
448 were assumed to be 3.64 and 3.07 days respectively, with standard deviations for Bayesian priors  
449 on these parameters of 0.711 and 0.770 respectively. The incubation period was assumed to be  
450 log-normally distributed, with mean and standard deviation (both on the log scale) of 1.621 and  
451 0.418 respectively, with standard deviations for Bayesian priors on these parameters of 0.064

452 and 0.0691 respectively. We used a smoothing window of 7 days and ran 4 chains each for 4000  
453 iterations with 1000 iterations of warm up.

## References

1. H. V. Fineberg, M. E. Wilson. Epidemic science in real time. *Science* **324**, 987 (2009).
2. Y. Hsieh, D. N. Fisman, J. Wu. On epidemic modeling in real time: An application to the 2009 Novel A (H1N1) influenza outbreak in Canada. *BMC Res. Notes* **3**, 283 (2010).
3. J. Lourenço, R. Paton, M. Ghafari, M. Kraemer, C. Thompson, P. Simmonds, P. Klenerman, S. Gupta. Fundamental principles of epidemic spread highlight the immediate need for large-scale serological surveys to assess the stage of the SARS-CoV-2 epidemic. <https://www.medrxiv.org/content/10.1101/2020.03.24.20042291v1> (2020).
4. T. K. Tsang, P. Wu, Y. Lin, E. H. Y. Lau, G. M. Leung, B. J. Cowling. Effect of changing case definitions for COVID-19 on the epidemic curve and transmission parameters in mainland China: a modelling study. *Lancet Public Health* **5**, e289–296 (2020).
5. S. A. Lauer, K. H. Grantz, Q. Bi, F. K. Jones, Q. Zheng, H. R. Meredith, A. S. Azman, N. G. Reich, J. Lessler. The incubation period of coronavirus disease 2019 (COVID-19) from publicly reported confirmed cases: estimation and application. *Ann. Int. Med.* **172**, 577–582 (2020).
6. T. Jombart, K. van Zandvoort, T. W. Russell, C. I. Jarvis, A. Gimma, S. Abbott, S. Clifford, S. Funk, H. Gibbs, Y. Liu, C. A. B. Pearson, N. I. Bosse, Centre for the Mathematical Modelling of Infectious Diseases COVID-19 Working Group, R. M. Eggo, A. J. Kucharski, W. J. Edmunds. Inferring the number of COVID-19 cases from recently reported deaths. *Wellcome Open Res.* **5** (2020).
7. M. Lipsitch, D. L. Swerdlow, L. Finelli. Defining the epidemiology of COVID-19—studies needed. *NEJM* **382**, 1194–1196 (2020).
8. A. Tahamtan, A. Ardebili. Real-time RT-PCR in COVID-19 detection: issues affecting the results. *Expert Rev. Mol. Diagn.* **20**, 453–454 (2020).
9. C. P. West, V. M. Montori, P. Sampathkumar. COVID-19 testing: the threat of false-negative results. *Mayo Clin. Proc.* **95**, 1127–1129 (2020).
10. J. L. Vaerman, P. Saussoy, I. Ingargiola. Evaluation of real-time PCR data. *J. Biol. Regul. Homeost. Agents* **18**, 212–214 (2004).
11. M. R. Tom, M. J. Mina. To interpret the SARS-CoV-2 test, consider the cycle threshold value. *Clin. Inf. Dis.* [10.1093/cid/ciaa619](https://doi.org/10.1093/cid/ciaa619) (2020).
12. J. A. Fuller, M. K. Njenga, G. Bigogo, B. Aura, M. O. Ope, L. Nderitu, L. Wakhule, D. D. Erdman, R. F. Breiman, D. R. Feikin. Association of the C<sub>T</sub> values of real-time PCR of viral upper respiratory tract infection with clinical severity, Kenya. *J. Med. Virol.* **85**, 924–932 (2013).
13. S. Bolotin, S. L. Deeks, A. Marchand-Austin, H. Rilkoﬀ, V. Dang, R. Walton, A. Hashim, D. Farrell, N. S. Crowcroft. Correlation of Real Time PCR Cycle Threshold Cut-Off with *Bordetella pertussis* Clinical Severity. *PLoS One* **10**, e0133209 (2015).



14. T. K. Tsang, B. J. Cowling, V. J. Fang, K. H. Chan, D. K. M. Ip, G. M. Leung, J. S. M. Peiris, S. Cauchemez. Influenza A virus shedding and infectivity in households. *J. Inf. Dis.* **212**, 1420–1428 (2015).
15. M. Moraz, D. Jacot, M. Papadimitriou-Olivgeris, L. Senn, G. Greub, K. Jaton, O. Opota. Clinical importance of reporting SARS-CoV-2 viral loads across the different stages of the COVID-19 pandemic. <https://www.medrxiv.org/content/10.1101/2020.07.10.20149773v1> (2020).
16. D. Jacot, G. Greub, K. Jaton, O. Opota. Viral load of SARS-CoV-2 across patients and compared to other respiratory viruses. <https://www.medrxiv.org/content/10.1101/2020.07.15.20154518v1> (2020).
17. Y. Chen, L. Li. SARS-CoV-2: virus dynamics and host response. *Lancet Inf. Dis.* **20**, 515–516 (2020).
18. T. C. Jones, B. Mühlemann, T. Veith, G. Biele, M. Zuchowski, J. Hoffmann, A. Stein, A. Edelmann, V. M. Corman, C. Drosten. An analysis of SARS-CoV-2 viral load by patient age. <https://www.medrxiv.org/content/10.1101/2020.06.08.20125484v1> (2020).
19. K. K. W. To, O. T. Y. Tsang, W. S. Leung, A. R. Tam, T. C. Wu, D. C. Lung, C. C. Y. Yip, J. P. Cai, J. M. C. Chan, T. S. H. Chik, D. P. L. Lau, C. Y. C. Choi, L. L. Chen, W. M. Chan, K. H. Chan, J. D. Ip, A. C. K. Ng, R. W. S. Poon, C. T. Luo, Vi. C. C. Cheng, J. F. W. Chan, I. F. N. Hung, Z. Chen, H. Chen, K. Y. Yuen. Temporal profiles of viral load in posterior oropharyngeal saliva samples and serum antibody responses during infection by SARS-CoV-2: an observational cohort study. *Lancet Inf. Dis.* **20**, 565–574 (2020).
20. Q. Z. Long, X. J. Tang, Q. L. Shi, Q. Li, H. J. Deng, J. Yuan, J. L. Hu, W. Xu, Y. Zhang, F. J. Lv, K. Su, F. Zhang, J. Gong, B. Wu, X. M. Liu, J. J. Li, J. F. Qiu, J. Chen, A. L. Huang. Clinical and immunological assessment of asymptomatic SARS-CoV-2 infections. *Nature Med.* [10.1038/s41591-020-0965-6](https://doi.org/10.1038/s41591-020-0965-6) (2020).
21. M. Cevik, M. Tate, O. Lloyd, A. E. Maraolo, J. Schafers , A. Ho. SARS-CoV-2 viral load dynamics, duration of viral shedding and infectiousness – a living systematic review and meta-analysis. <https://www.medrxiv.org/content/10.1101/2020.07.25.20162107v1> (2020)
22. A. Chandrashekar, J. Liu, A. J. Martinot, K. McMahan, N. B. Mercado, L. Peter, L. H. Tostanoski, J. Yu, Z. Maliga, M. Nekorchuk, K. Busman-Sahay, M. Terry, L. M. Wrijil, S. Ducat, D. R. Martinez, C. Atyeo, S. Fischinger, J. S. Burke, M. D. Slein, L. Pessaint, A. Van Ry, J. Greenhouse, T. Taylor, K. Blade, A. Cook, B. Finneyfrock, R. Brown, E. Teow, J. Velasco, R. Zahn, F. Wegmann, P. Abbink, E. A. Bondzie, G. Dagotto, M. S. Gebre, X. He, C. Jacob-Dolan, N. Kordana, Z. Li, M. A. Lifton, S. H. Mahrokhian, L. F. Maxfield, R. Nityanandam, J. P. Nkolola, A. G. Schmidt, A. D. Miller, R. S. Baric, G. Alter, P. K. Sorger, J. D. Estes, H. Andersen, M. G. Lewis, D. H. Barouch. SARS-CoV-2 infection protects against rechallenge in rhesus macaques. *Science* [10.1126/science.abc4776](https://doi.org/10.1126/science.abc4776) (2020).
23. J. Yu, L. H. Tostanoski, L. Peter, N. B. Mercado, K. McMahan, S. H. Mahrokhian, J. P. Nkolola, J. Liu, Z. Li, A. Chandrashekar, D. R. Martinez, C. Loos, C. Atyeo, S. Fischinger, J. S. Burke, M. D. Slein, Y. Chen, A. Zuiani, F. J. N. Lelis, M. Travers, S. Habibi, L. Pessaint, A. Van Ry, K. Blade, R. Brown, A. Cook, B. Finneyfrock, A. Dodson, E. Teow, J. Velasco, R. Zahn, F. Wegmann, E. A. Bondzie, G. Dagotto, M. S. Gebre, X. He, C. Jacob-Dolan, M. Kirilova, N. Kordana, Z. Lin, L. F. Maxfield, F. Nampanya, R. Nityanandam, J. D. Ventura, H. Wan, Y. Cai, B. Chen, A. G. Schmidt, D. R. Wesemann,

- R. S. Baric, G. Alter, H. Andersen, M. G. Lewis, D. H. Barouch. DNA vaccine protection against SARS-CoV-2 in rhesus macaques. *Science* [10.1126/science.abc6284](https://doi.org/10.1126/science.abc6284) (2020).
24. A. T. Xiao, Y. X. Tong, S. Zhang. Profile of RT-PCR for SARS-CoV-2: a preliminary study from 56 COVID-19 patients. *Clin. Inf. Dis.* [10.1093/cid/ciaa460](https://doi.org/10.1093/cid/ciaa460) (2020).
25. R. Wölfel, V. M. Corman, W. Guggemos, M. Seilmaier, S. Zange, M. A. Müller, D. Niemeyer, T. C. Jones, P. Vollmar, C. Rothe, M. Hoelscher, T. Bleicker, S. Brünink, J. Schneider, R. Ehmann, K. Zwirgmaier, C. Drosten, C. Wendtner. Virological assessment of hospitalized patients with COVID-19. *Nature* **581**, 465–469 (2020).
26. X. He, E. H. Y. Lau, P. Wu, X. Deng, J. Wang, X. Hao, Y. C. Lau, J. Y. Wong, Y. Guan, X. Tan, X. Mo, Y. Chen, B. Liao, W. Chen, F. Hu, Q. Zhang, M. Zhong, Y. Wu, L. Zhao, F. Zhang, B. J. Cowling, F. Li, G. M. Leung. Temporal dynamics in viral shedding and transmissibility of COVID-19. *Nature Med.* **26**, 672–675 (2020).
27. D. B. Larremore, B. Wilder, E. Lester, S. Shehata, J. M. Burke, J. A. Hay, M. Tambe, M. J. Mina, R. Parker. Test sensitivity is secondary to frequency and turnaround time for COVID-19 surveillance. <https://www.medrxiv.org/content/10.1101/2020.06.22.20136309v2> (2020).
28. S. Riley, K. E. C. Ainslie, O. Eales, B. Jeffrey, C. E. Walters, C. J. Atchison, P. J. Diggle, D. Ashby, C. A. Donnelly, G. Cooke, W. Barclay, H. Ward, G. Taylor, A. Darzi, P. Elliott. Community prevalence of SARS-CoV-2 virus in England during May 2020: REACT study. <https://www.medrxiv.org/content/10.1101/2020.07.10.20150524v1> (2020).
29. H. Salje, D. A. T. Cummings, I. Rodriguez-Barraquer, L. C. Katzelnick, J. Lessler, C. Klungthong, B. Thaisomboonsuk, A. Nisalak, A. Weg, D. Ellison, L. Macareo, I. K. Yoon, R. Jarman, S. Thomas, A. L. Rothman, T. Endy, S. Cauchemez. Reconstruction of antibody dynamics and infection histories to evaluate dengue risk. *Nature* **557**, 719–723 (2018).
30. J. A. Hay, A. Minter, K. E. C. Ainslie, J. Lessler, B. Yang, D. A. T. Cummings, A. J. Kucharski, S. Riley. An open source tool to infer epidemiological and immunological dynamics from serological data: serosolver. *PLoS Comput. Biol.* **16**, e1007840 (2020).
31. B. Borremans, N. Hens, P. Beutels, H. Leirs, J. Reijnders. Estimating time of infection using prior serological and individual information can greatly improve incidence estimation of human and wildlife infections. *PLoS Comput. Biol.* **12**, e1004882 (2016).
32. K. M. Pepin, S. L. Kay, B. D. Golas, S. S. Shriner, A. T. Gilbert, R. S. Miller, A. L. Graham, S. Riley, P. C. Cross, M. D. Samuel, M. B. Hooten, J. A. Hoeting, J. O. Lloyd-Smith, C. T. Webb, M. G. Buhnerkempe. Inferring infection hazard in wildlife populations by linking data across individual and population scales. *Ecol. Lett.* **20**, 275–292 (2017).
33. X. Zhao, Y. Ning, M. I. C. Chen, A. R. Cook. Individual and population trajectories of influenza antibody titers over multiple seasons in a tropical country. *Am. J. Epidemiol.* **187**, 135–143 (2018).
34. D. De Angelis, W. R. Gilks, N. E. Day. Bayesian projection of the acquired immune deficiency syndrome epidemic. *J. R. Stat. Soc. Ser. C Appl. Stat.* **47**, 449–498 (1998).

35. H. E. de Melker, F. G. A. Versteegh, J. F. P. Schellekens, P. F. M. Teunis, M. Kretzschmar. The incidence of Bordetella pertussis infections estimated in the population from a combination of serological surveys. *J. Infect.* **53**, 106–113 (2006).
36. J. Simonsen, K. Mølbak, G. Falkenhorst, K. A. Krogfelt, A. Linneberg, P. F. M. Teunis. Estimation of incidences of infectious diseases based on antibody measurements. *Stat. Med.* **28**, 1882–1895 (2009).
37. P. F. M. Teunis, J. C. H. van Eijkeren, C. W. Ang, Y. T. H. P. van Duynhoven, J. B. Simonsen, M. A. Strid, W. van Pelt. Biomarker dynamics: estimating infection rates from serological data. *Stat. Med.* **31**, 2240–2248 (2012).
38. D. A. Helb, K. K. A. Tetteh, P. L. Felgner, J. Skinner, A. Hubbard, E. Arinaitwe, H. Mayanja-Kizza, I. Ssewanyana, M. R. Kanya, J. G. Beeson, J. Tappero, D. L. Smith, P. D. Crompton, P. J. Rosenthal, G. Dorsey, C. J. Drakeley, B. Greenhouse. Novel serologic biomarkers provide accurate estimates of recent Plasmodium falciparum exposure for individuals and communities. *Proc. Natl. Acad. Sci. U.S.A.* **112**, E4438–E4447 (2015).
39. J. Wallinga, M. Lipsitch. How generation intervals shape the relationship between growth rates and reproductive numbers. *Proc. R. Soc. B* **274**, 599–604 (2007).
40. M. Gousseff, P. Penot, L. Gallay, D. Batisse, N. Benez, K. Bouiller, R. Collarino, A. Conrad, D. Slama, C. Joseph, A. Lemaigen, F.-X. Lescure, B. Levy, M. Mahevas, B. Pozzetto, N. Vignier, B. Wyplosz, D. Salmon, F. Goehringer, E. Botelho-Nevers. Clinical recurrences of COVID-19 symptoms after recovery: viral lapse, reinfection or inflammatory rebound? *J. Infect.* [10.1016/j.jinf.2020.06.073](https://doi.org/10.1016/j.jinf.2020.06.073) (2020).
41. R. Niehus, E. van Kleef, A. Turlej-Rogacka, C. Lammens, Y. Carmeli, H. Goossens, E. Tacconelli, B. Carevic, L. Preotescu, S. Malhotra-Kumar, B. S. Cooper. Quantifying antibiotic impact on within-patient dynamics of extended-spectrum beta-lactamase resistance. *eLife* **9**, e49206 (2020).
42. D. Rhoads, D. R. Peaper, R. C. She, F. S. Nolte, C. M. Wojewoda, N. W. Anderson, B. S. Pritt. College of American Pathologists (CAP) Microbiology Committee perspective: caution must be used in interpreting the cycle threshold (Ct) value. *Clin. Infect. Dis.* [10.1093/cid/ciaa1199](https://doi.org/10.1093/cid/ciaa1199) (2020).
43. Z. Zhang, T. Xiao, Y. Wang, J. Yuan, H. Ye, L. Wei, H. Wang, X. Liao, S. Qian, Z. Wang, L. Liu. Early viral clearance and antibody kinetics of COVID-19 among asymptomatic carriers. <https://www.medrxiv.org/content/10.1101/2020.04.28.20083139v1> (2020).
44. L. Held. A discussion and reanalysis of the results reported in Jones et al. (2020). <https://osf.io/bkuar/> (2020).
45. W.-C. Ko, J.-M. Rolain, N.-Y. Lee, P.-L. Chen, C.-T. Huang, P.-I. Lee, P.-R. Hsueh. Arguments in favour of remdesivir for treating SARS-CoV-2 infections. *Int. J. Antimicrob. Agents* **55**, 105933 (2020).
46. M. M. Arons, K. M. Hatfield, S. C. Reddy, A. Kimball, A. James, J. R. Jacobs, J. Taylor, K. Spicer, A. C. Bardossy, L. P. Oakley, S. Tanwar, J. W. Dyal, J. Harney, Z. Chisty, J. M. Bell, M. Methner, P. Paul, C. M. Carlson, H. P. McLaughlin, N. Thornburg, S. Tong, A. Tamin, Y. Tao, A. Uehara, J. Harcourt, S. Clark, C. Brostrom-Smith, L. C. Page, M. Kay, J. Lewis, P. Montgomery, N. D. Stone, T. A. Clark, M. A. Honein, J. S. Duchin, J. A.

- Jernigan. Presymptomatic SARS-CoV-2 infections and transmission in a skilled nursing facility. *NEJM* **382**, 2081–2090 (2020).
47. J. Y. Kim, J. H. Ko, Y. Kim, Y. J. Kim, J. M. Kim, Y. S. Chung, H. M. Kim, M. G. Han, S. Y. Kim, B. S. Chin. Viral load kinetics of SARS-CoV-2 infection in first two patients in Korea. *J. Korean Med. Sci.* **35**, e86 (2020).
  48. Y. Liu, L. M. Yan, L. Wan, T. X. Xiang, A. Le, J. M. Liu, M. Peiris, L. L. M. Poon, W. Zhang. Viral dynamics in mild and severe cases of COVID-19. *Lancet Inf. Dis.* **20**, 656–657 (2020).
  49. B. Borremans, A. Gamble, K. C. Prager, S. K. Helman, A. M. McClain, C. Cox, V. Savage, J. O. Lloyd-Smith. Quantifying antibody kinetics and RNA shedding during early-phase SARS-CoV-2 infection. <https://www.medrxiv.org/content/10.1101/2020.05.15.20103275v1> (2020).
  50. S. T. Ali, L. Wang, E. H. Y. Lau, X.-K. Xu, Z. Du, Y. Wu, G. M. Leung, B. J. Cowling. Serial interval of SARS-CoV-2 was shortened over time by nonpharmaceutical interventions. *Science* [10.1126/science.abc9004](https://doi.org/10.1126/science.abc9004) (2020).
  51. The New York Times. Covid in the U.S.: Latest Map and Case Count. *New York Times* 2020. Accessed at <https://www.nytimes.com/interactive/2020/us/coronavirus-us-cases.html> on September 8, 2020.
  52. S. Abbott, J. Hellewell, R. N. Thompson, K. Sherratt, H. P. Gibbs, N. I. Bosse, J. D. Munday, S. Meakin, E. L. Doughty, J. Y. Chun, Y. W. D. Chan, F. Finger, P. Campbell, A. Endo, C. A. B. Pearson, A. Gimma, T. Russell, CMMID COVID modelling group, S. Flasche, A. J. Kucharski, R. M. Eggo, S. Funk. Estimating the time-varying reproduction number of SARS-CoV-2 using national and subnational case counts. *Wellcome Open Res.* [awaiting peer review] **5**, 112 (2020).
  53. B. Carpenter, A. Gelman, M. D. Hoffman, D. Lee, B. Goodrich, M. Betancourt, M. A. Brubaker, J. Guo, P. Li, A. Riddell. Stan: a probabilistic programming language. *J. Stat. Softw.* **76**, v076i01 (2017).
  54. K. M. Gostic, L. McGough, E. B. Baskerville, S. Abbott, K. Joshi, C. Tedijanto, R. Kahn, R. Niehaus, J. Hay, P. M. De Salazar, J. Hellewell, S. Meakin, J. Munday, N. I. Bosse, K. Sherratt, R. N. Thompson, L. F. White, J. S. Huisman, J. Scire, S. Bonhoeffer, T. Stadler, J. Wallinga, S. Funk, M. Lipsitch, S. Cobey. Practical considerations for measuring the effective reproductive number,  $R_t$ . <https://www.medrxiv.org/content/10.1101/2020.06.18.20134858v3> (2020).

## Supplementary Figures and Tables

**Table S1.** Parameters in the viral load and cycle threshold (Ct) value distribution. Point estimates shown are used in the simulations for Figs. 1, 4, S1, and S2. Bayesian priors are used in Fig. 4.

| Parameter     | Description                                                                                                                  | Prior distribution | Point estimate (mean) | Standard deviation |
|---------------|------------------------------------------------------------------------------------------------------------------------------|--------------------|-----------------------|--------------------|
| $\beta$       | Exponential growth rate                                                                                                      | Normal             | 0                     | 0.10               |
| $t_{shift}$   | Time (in days) from infection to start of growth of viral load                                                               | Fixed              | 2.00                  | NA                 |
| $t_{peak}$    | Time (in days) from infection to peak viral load                                                                             | Fixed              | 4.00                  | NA                 |
| $t_{switch}$  | Time (in days) from infection to start of reduced waning viral load rate and additional probability of becoming undetectable | Normal             | 16.0                  | 1.00               |
| $t_{LOD}$     | Time (in days) from $t_{switch}$ until the mean viral load is equal to the limit of detection ( $VL_{LOD}$ )                 | Normal             | 30.0                  | 1.50               |
| $VL_{zero}$   | Mean viral load (in $\log_{10}$ copies RNA per mL) for $a \leq t_{shift}$                                                    | Fixed              | -3.00                 | NA                 |
| $VL_{peak}$   | Mean peak viral load (in $\log_{10}$ copies RNA per mL) at $a = t_{peak}$                                                    | Normal             | 9.00                  | 1.00               |
| $VL_{switch}$ | Mean viral load (in $\log_{10}$ copies RNA per mL) at $a = t_{switch}$                                                       | Normal             | 3.70                  | 0.125              |
| $SD$          | Standard deviation (for Gumbel                                                                                               | Normal             | 6.00                  | 0.50               |

|            |                                                                                |       |      |      |
|------------|--------------------------------------------------------------------------------|-------|------|------|
|            | distribution) of cycle threshold (Ct) values around mean at any day $a$        |       |      |      |
| $p_{addl}$ | Probability of becoming permanently undetectable each day for $a > t_{switch}$ | Beta  | 0.12 | 0.05 |
| $Ct_{LOD}$ | Limit of detection for Ct values                                               | Fixed | 40.0 | NA   |
| $VL_{LOD}$ | Limit of detection for viral loads (in $\log_{10}$ copies RNA per mL)          | Fixed | 3.00 | NA   |

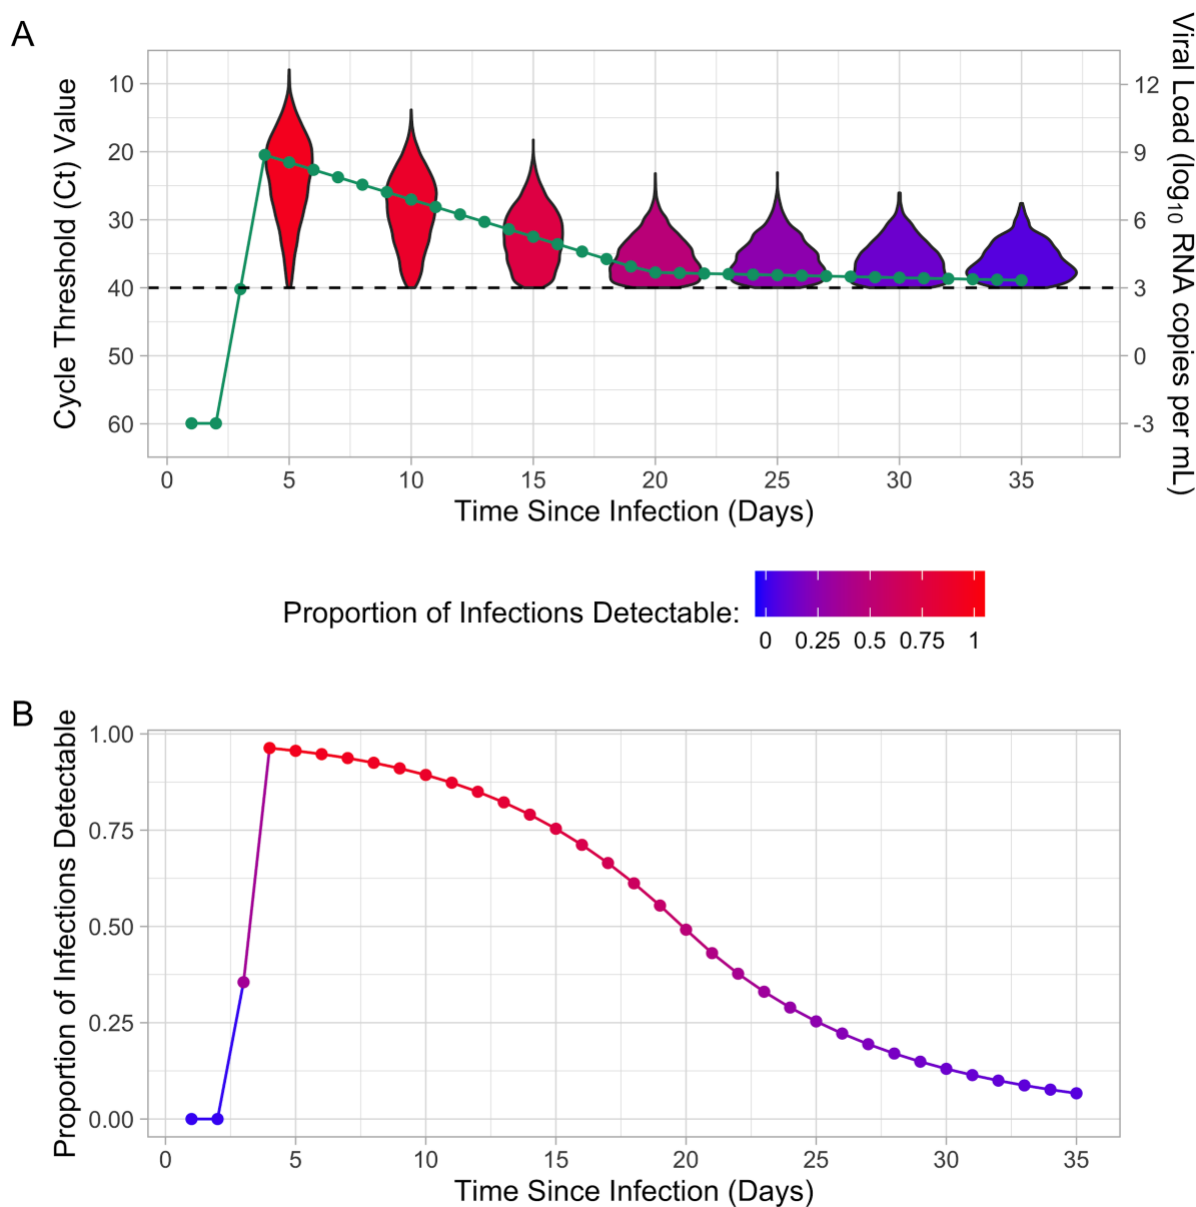

**Figure S1. (A)** Mean cycle threshold (Ct) value, mean viral load, and distribution of Ct values for detectable infections by time since infection. **(B)** Proportion of infections that are detectable by time since infection for the population-level Ct distribution. The proportion of infections that are detectable is indicated by the color of the violin plot and the proportion detectable line. The dashed line indicates the limit of detection (Ct value of 40 or viral load of 3).

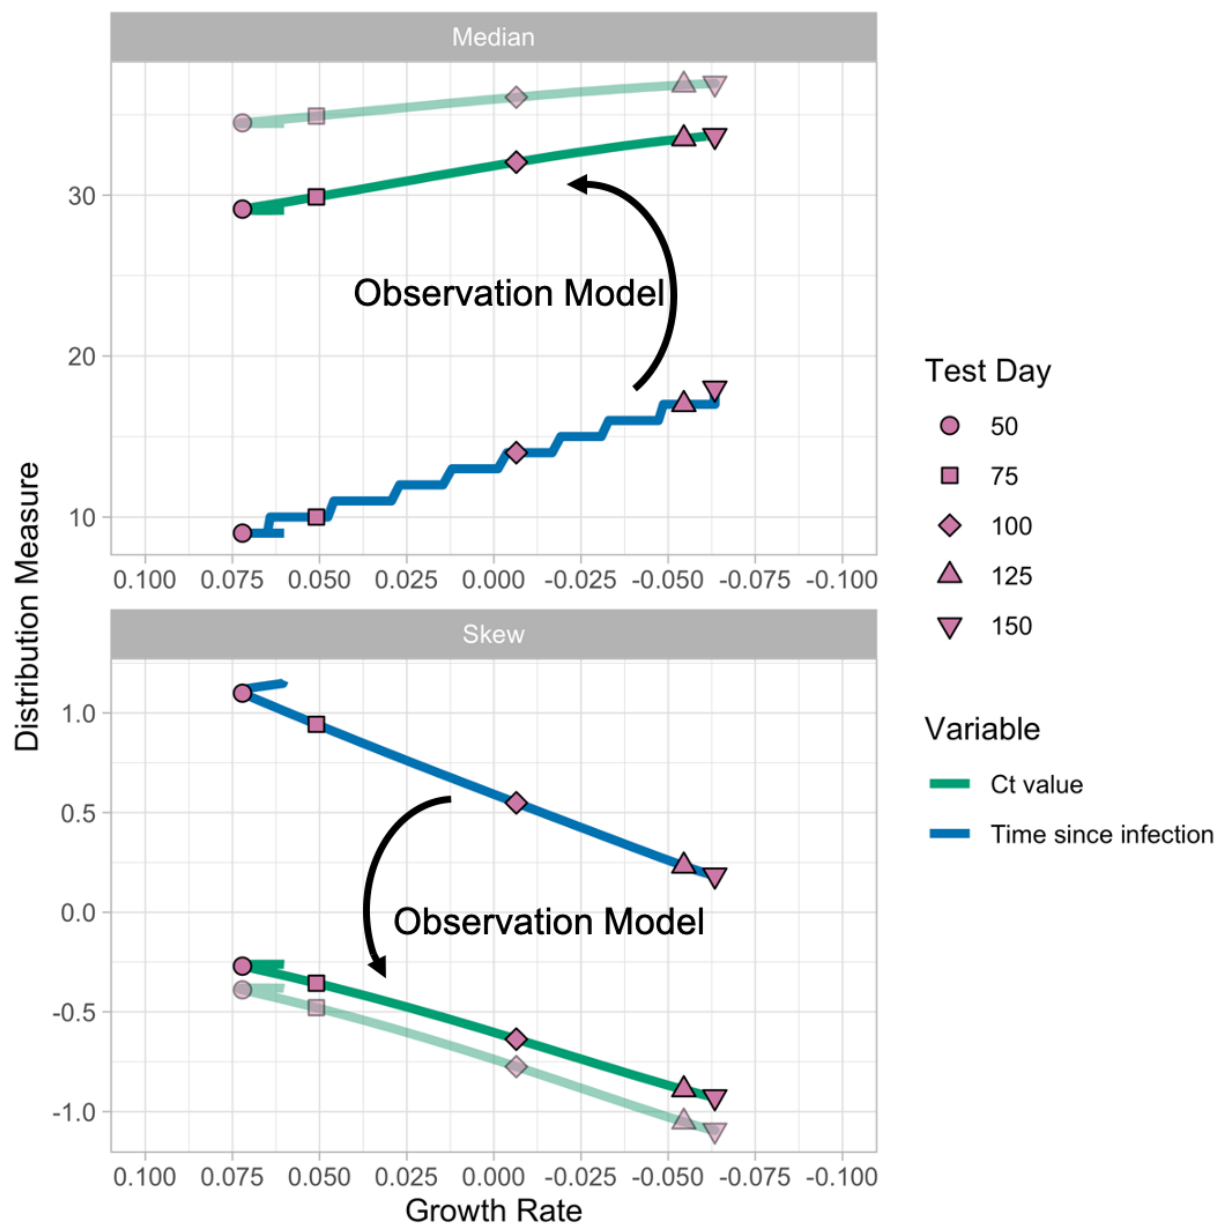

**Figure S2.** Relationship between time since infection and detectable cycle threshold (Ct) distribution and growth rate. The median and skew of the time since infection distribution are directly related to growth rate. Although the time since infection distribution (blue lines indicate median, top, and skew, of time-since-infection) is not observed directly, Ct values can be used as a proxy observation model. The solid green line shows the observation model assumed for Fig. 1, whereas the faint green line shows how a relationship would still exist for an alternative observation model, the two differing, for example, by different tests in different labs. The test days shown in Fig. 1 are indicated by points. All results are based on an SEIR model in a population of 1,000,000 with  $R_0 = 2.5$ , average latent period of 6.41 days, and average infectious period of 8.79 days, and Ct values are distributed according to the population-level Ct value distribution.



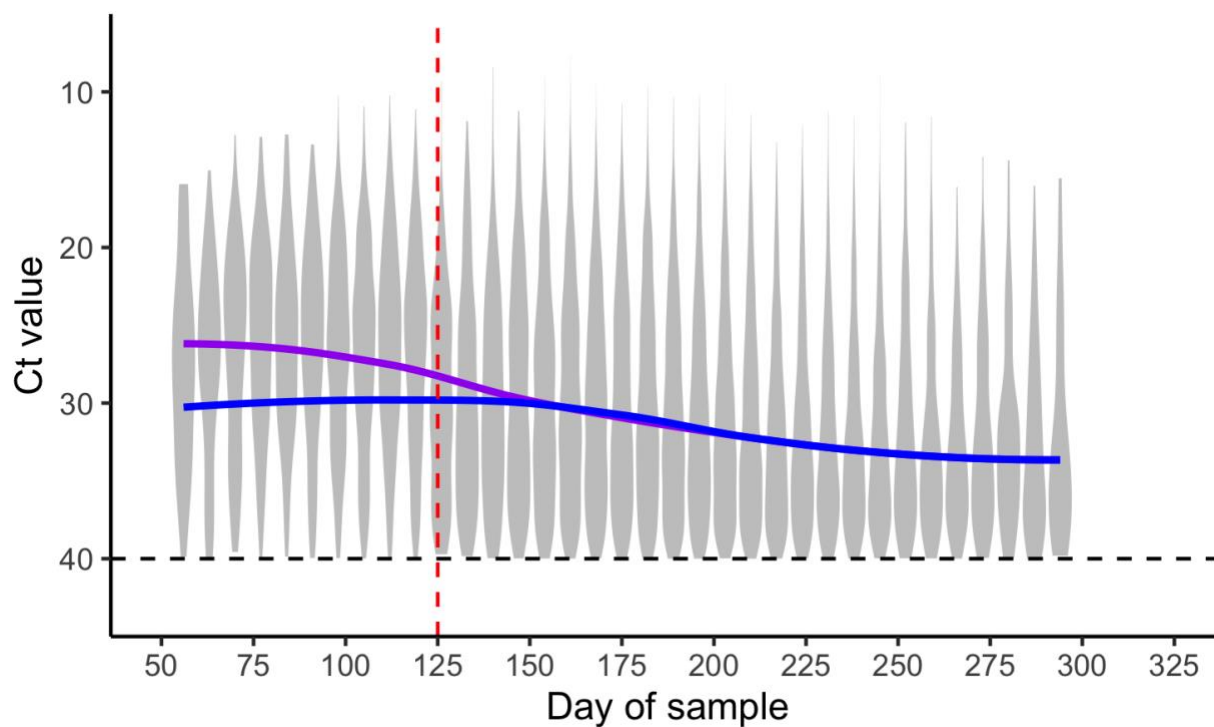

**Figure S3.** Weekly distribution of positive (detectable) Ct values as in **Fig. 2**, but up to day 125 sampled individuals are a combination of randomly sampled cross-sections and individuals sampled in the days immediately after symptom onset, assuming that 35% of infections become symptomatic. The blue line shows the smoothed median from only cross-sectionally sampled individuals, whereas the purple line shows the smoothed median from combined cross-sectional and symptomatic sampled individuals. The violin plot shows densities of all sampled individuals. For these simulations, all symptomatic individuals had a 10% probability of being detected up to day 125. For detected individuals, we added a delay between symptom onset and sampling time drawn from a discretized gamma distribution with a mean of 2.5 days and standard deviation of 1 day.
